# Supplementary material
Source: PubMed Central journal article supplement (PMC4187952)
Supplement: AAC.02949-14_zac010143332so1.pdf [file AAC.02949-14_zac010143332so1.pdf]

**TABLE S1** Identity of open reading frames (*orf*) present in the *erm*(44)-containing prophage  $\phi$  JW4341-pro of *Staphylococcus xylosus* JW4341 (GenBank/EMBL acc. no. HG796218) with genes present in the GenBank, January 2014, as well as identity to putative domains.

| GenBank Designation | Gene Location and Orientation |      |             | ExPASy PROSITE Motif<br>( <a href="http://prosite.expasy.org/">http://prosite.expasy.org/</a> ) | NCBI Superfamilies/<br>Multi-domains<br>( <a href="http://www.ncbi.nlm.nih.gov/Structure/cdd/wrpsb.cgi">http://www.ncbi.nlm.nih.gov/Structure/cdd/wrpsb.cgi</a> ) | NCBI pBLAST result<br>( <a href="http://blast.ncbi.nlm.nih.gov/Blast.cgi">http://blast.ncbi.nlm.nih.gov/Blast.cgi</a> ) | Accession number of highest identity pBLAST alignment to gene | Identity with gene / Coverage with gene (in percent) of pBLAST alignment |
|---------------------|-------------------------------|------|-------------|-------------------------------------------------------------------------------------------------|-------------------------------------------------------------------------------------------------------------------------------------------------------------------|-------------------------------------------------------------------------------------------------------------------------|---------------------------------------------------------------|--------------------------------------------------------------------------|
|                     | Start                         | End  | Orientation |                                                                                                 |                                                                                                                                                                   |                                                                                                                         |                                                               |                                                                          |
| <i>orf1</i>         | 2482                          | 3519 | -           | no hit                                                                                          | INT_P4[cd00801]                                                                                                                                                   | <i>S. equorum</i> Phage integrase                                                                                       | WP_002512109                                                  | 79/100                                                                   |
| <i>orf2</i>         | 3576                          | 4244 | -           | PS51257<br>PROKAR_LIPOPROTEIN<br>Prokaryotic membrane lipoprotein lipid                         | no hit                                                                                                                                                            | hypothetical protein [ <i>Staphylococcus carnosus</i> subsp. <i>carnosus</i> ]                                          | YP_002634606                                                  | 39/99                                                                    |
| <i>orf3</i>         | 4296                          | 4919 | -           | no hit                                                                                          | DUF4352[cl13117]                                                                                                                                                  | hypothetical protein [ <i>Staphylococcus epidermidis</i> ]                                                              | WP_002503297                                                  | 67/83                                                                    |
| <i>orf4</i>         | 5129                          | 5572 | -           | no hit                                                                                          | DUF955[cl01076]                                                                                                                                                   | hypothetical protein [ <i>Staphylococcus aureus</i> ]                                                                   | WP_000281659                                                  | 47/99                                                                    |
| <i>orf5</i>         | 5574                          | 5903 | -           | PS50943 HTH_CROC1<br>Cro/C1-type HTH                                                            | -HTH_XRE [cd00093]<br>-HipB[COG1396]                                                                                                                              | Cro/CI family transcriptional regulator [ <i>Staphylococcus aureus</i> subsp. <i>aureus</i> COL]                        | YP_185761                                                     | 67/95                                                                    |
| <i>orf6</i>         | 6081                          | 6320 | +           | PS50943 HTH_CROC1<br>Cro/C1-type HTH                                                            | HTH_XRE[cd00093]                                                                                                                                                  | Cro/CI family transcriptional regulator [ <i>Staphylococcus caprae</i> ]                                                | WP_002453556                                                  | 97/66                                                                    |
| <i>orf7</i>         | 6322                          | 7041 | +           | no hit                                                                                          | - ORF6C[cl11181]<br>-Phage_pRha super family[cl10713]                                                                                                             | Rha family transcriptional regulator [ <i>Staphylococcus xylosus</i> ] (Phage_pRha)                                     | WP_017722683                                                  | 53/68                                                                    |
| <i>orf8</i>         | 7153                          | 8004 | -           | no hit                                                                                          | DUF4393[cl16812]                                                                                                                                                  | hypothetical protein StauST398-1_0049 [ <i>Staphylococcus</i> phage StauST398-1]                                        | YP_008059022                                                  | 56/99                                                                    |
| <i>orf9</i>         | 8099                          | 8416 | +           | no hit                                                                                          | DUF771[cl09962]                                                                                                                                                   | hypothetical protein, <i>S. equorum</i> , <i>Staphylococcus</i> phage 2638A                                             | WP_002512120                                                  | 67/100                                                                   |
| <i>orf10</i>        | 9152                          | 9775 | +           | no hit                                                                                          | DUF1071[cl05727]                                                                                                                                                  | putative topoisomerase [ <i>Staphylococcus</i> phage phiRS7]                                                            | WP_002482931                                                  | 89/99                                                                    |

|              |       |       |   |                                                |                                                           |                                                                              |              |         |
|--------------|-------|-------|---|------------------------------------------------|-----------------------------------------------------------|------------------------------------------------------------------------------|--------------|---------|
| <i>orf11</i> | 9772  | 10221 | + | PS50935 SSB Single-strand binding (SSB) domain | Ssb[COG0629]                                              | single-stranded DNA-binding protein<br>[ <i>Staphylococcus xylosus</i> ]     | WP_017722690 | 93/100  |
| <i>orf12</i> | 10233 | 10898 | + | no hit                                         | DUF968[cl18484]                                           | hypothetical protein<br>[ <i>Staphylococcus xylosus</i> ]                    | WP_017722691 | 97/100  |
| <i>orf13</i> | 10899 | 11405 | + | no hit                                         | HTH_36 super family[cl18666]                              | hypothetical protein SPTP3103_gp20<br>[ <i>Staphylococcus</i> phage tp310-3] | YP_001429982 | 79/92   |
| <i>orf14</i> | 11630 | 12403 | + | no hit                                         | - AAA[cd00009]<br>-PRK08116<br>[PRK08116]                 | DNA replication protein DnaC<br>[ <i>Staphylococcus capitis</i> ]            | WP_002470008 | 82/92   |
| <i>orf15</i> | 12795 | 13199 | + | no hit                                         | DUF1064<br>[pfam06356]                                    | hypothetical protein<br>[ <i>Staphylococcus xylosus</i> ]                    | WP_017722696 | 99/100  |
| <i>orf16</i> | 13392 | 13742 | + | no hit                                         | PVL_ORF50 super family[cl06686]                           | hypothetical protein<br>[ <i>Staphylococcus xylosus</i> ]                    | WP_017722698 | 72/100  |
| <i>orf17</i> | 13743 | 14285 | + | no hit                                         | no hit                                                    | phage protein<br>[ <i>Staphylococcus equorum</i> ]                           | WP_002512134 | 44/100  |
| <i>orf18</i> | 14356 | 14712 | + | PS50830 TNASE_3 Thermonuclease domain          | SNc super family[cl00140]                                 | hypothetical protein<br>[ <i>Staphylococcus</i> sp. AL1]                     | WP_019469733 | 77/95   |
| <i>orf19</i> | 14705 | 15016 | + | no hit                                         | NTP-PPase_u3[cd11540]                                     | hypothetical protein phiRS7_0056<br>[ <i>Staphylococcus</i> phage phiRS7]    | AGW43792     | 99/92   |
| <i>orf20</i> | 15083 | 15418 | - | no hit                                         | Tic20 super family[cl15809]                               | hypothetical protein<br>[ <i>Staphylococcus</i> sp. HGB0015]                 | WP_016425416 | 56/95   |
| <i>orf21</i> | 15916 | 16164 | + | no hit                                         | no hit                                                    | hypothetical protein<br>[ <i>Staphylococcus xylosus</i> ]                    | WP_017722718 | 99/100  |
| <i>orf22</i> | 16223 | 16621 | + | no hit                                         | no hit                                                    | hypothetical protein phiRS7_0061<br>[ <i>Staphylococcus</i> phage phiRS7]    | AGW43797     | 63/99   |
| <i>orf23</i> | 16817 | 17539 | + | no hit                                         | -HNHc[cd00085]<br>-COG4639<br>[COG4639]<br>-McrA[COG1403] | HNH endonuclease<br>[ <i>Staphylococcus xylosus</i> ]                        | WP_017722720 | 98/100  |
| <i>orf24</i> | 17638 | 17946 | + | no hit                                         | Terminase_4 super family[cl01525]                         | Terminase<br>[ <i>Staphylococcus xylosus</i> ]                               | WP_017722721 | 100/100 |
| <i>orf25</i> | 17936 | 19630 | + | no hit                                         | COG4626<br>[COG4626]                                      | terminase<br>[ <i>Staphylococcus xylosus</i> ]                               | WP_017722722 | 100/100 |
| <i>orf26</i> | 19634 | 20905 | + | no hit                                         | portal_HK97[TIGR01537]                                    | portal protein [ <i>Staphylococcus xylosus</i> ]                             | WP_017722723 | 99/97   |
| <i>orf27</i> | 20856 | 21626 | + | no hit                                         | S14_ClpP_1[cd07016]                                       | peptidase<br>[ <i>Staphylococcus xylosus</i> ]                               | WP_017722724 | 98/100  |
| <i>orf28</i> | 21642 | 22817 | + | no hit                                         | Phage_capsid super                                        | phage capsid protein                                                         | WP_017722725 | 87/100  |

|              |       |       |   |        |                                                                               |                                                           |               |        |
|--------------|-------|-------|---|--------|-------------------------------------------------------------------------------|-----------------------------------------------------------|---------------|--------|
|              |       |       |   |        | family[cl12304]                                                               | [ <i>Staphylococcus xylosus</i> ]                         |               |        |
| <i>orf29</i> | 22890 | 23177 | + | no hit | -head tail connector<br>gp6[cd08054]                                          | hypothetical protein<br>[ <i>Staphylococcus xylosus</i> ] | WP_017722726  | 97/100 |
| <i>orf30</i> | 23363 | 23518 | + | no hit | no hit                                                                        | hypothetical protein<br>[ <i>Staphylococcus xylosus</i> ] | WP_017722727  | 96/94  |
| <i>orf31</i> | 23511 | 23936 | + | no hit | no hit                                                                        | hypothetical protein<br>[ <i>Staphylococcus xylosus</i> ] | WP_017722728  | 97/100 |
| <i>orf32</i> | 23933 | 24328 | + | no hit | no hit                                                                        | hypothetical protein<br>[ <i>Staphylococcus xylosus</i> ] | WP_017722729  | 96/100 |
| <i>orf33</i> | 24361 | 24993 | + | no hit | Phage_tail super<br>family[cl12297]                                           | hypothetical protein<br>[ <i>Staphylococcus xylosus</i> ] | WP_017722730  | 99/99  |
| <i>orf34</i> | 25089 | 25619 | + | no hit | Big_2 super<br>family[cl02708]                                                | tail protein<br>[ <i>Staphylococcus xylosus</i> ]         | WP_017722731  | 99/100 |
| <i>orf35</i> | 25687 | 26037 | + | no hit | no hit                                                                        | hypothetical protein<br>[ <i>Staphylococcus xylosus</i> ] | WP_017722732  | 97/100 |
| <i>orf36</i> | 26330 | 32643 | + | no hit | tape_meas_TP901<br>[TIGR01760]                                                | hypothetical protein<br>[ <i>Staphylococcus xylosus</i> ] | WP_017722734  | 89/99  |
| <i>orf37</i> | 32657 | 33493 | + | no hit | Sipho_tail super<br>family[cl17486]                                           | hypothetical protein<br>[ <i>Staphylococcus xylosus</i> ] | WP_017722735  | 98/100 |
| <i>orf38</i> | 34352 | 35089 | + | no hit | Prophage_tail super<br>family [cl12123]                                       | hypothetical protein<br>[ <i>Staphylococcus xylosus</i> ] | WP_017722736  | 94/97  |
| <i>orf39</i> | 35684 | 38314 | + | no hit | -Peptidase_G2<br>super family<br>[cl13409]<br>-Pectate_lyase_3<br>[pfam12708] | hypothetical protein<br>[ <i>Staphylococcus simiae</i> ]  | WP_002462649  | 72/99  |
| <i>orf40</i> | 38326 | 39834 | + | no hit | -DUF2479<br>[pfam10651]<br>-PRK13460<br>[PRK13460]                            | hypothetical protein<br>[ <i>Staphylococcus xylosus</i> ] | WP_017722739. | 82/100 |
| <i>orf41</i> | 39846 | 40250 | + | no hit | no hit                                                                        | hypothetical protein<br>[ <i>Staphylococcus xylosus</i> ] | WP_017722740  | 87/95  |
| <i>orf42</i> | 40441 | 40752 | + | no hit | no hit                                                                        | hypothetical protein<br>[ <i>Staphylococcus xylosus</i> ] | WP_002512170  | 46/89  |
| <i>orf43</i> | 40804 | 41115 | + | no hit | Phage_holin_5<br>super<br>family[cl06138]                                     | hypothetical protein<br>[ <i>Staphylococcus xylosus</i> ] | WP_017722743  | 84/88  |

|                                     |       |       |   |                                                      |                                                                                            |                                                                                                              |              |         |
|-------------------------------------|-------|-------|---|------------------------------------------------------|--------------------------------------------------------------------------------------------|--------------------------------------------------------------------------------------------------------------|--------------|---------|
| <i>orf44</i>                        | 41169 | 42536 | + | PS50911 CHAP CHAP domain                             | -SH3_5 super family[cl17964]<br>-PGRP super family[cl02712]<br>-CHAP super family[cl17642] | hypothetical protein<br>[ <i>Staphylococcus equorum</i> ]                                                    | WP_002512172 | 72/100  |
| <i>orf44</i>                        | 43396 | 44298 | + | no hit                                               | BCCT super family[cl00569]                                                                 | hypothetical protein<br>[ <i>Staphylococcus xylosus</i> ]                                                    | YP_001096319 | 77/99   |
| <i>orf46</i>                        | 44342 | 45022 | + | no hit                                               | BCCT super family[cl00569]                                                                 | hypothetical protein<br>[ <i>Staphylococcus xylosus</i> ]                                                    | YP_001096319 | 76/95   |
| <i>orf47</i>                        | 46038 | 46562 | + | no hit                                               | no hit                                                                                     | membrane protein<br>[ <i>Staphylococcus xylosus</i> ]                                                        | WP_017722449 | 90/100  |
| <i>orf48</i>                        | 47035 | 47448 | - | PS01031 HSP20 Heat shock hsp20 proteins family       | IbpA[COG0071]                                                                              | hypothetical protein<br>[ <i>Staphylococcus lentus</i> ]                                                     | WP_016998738 | 50/95   |
| <i>orf49</i>                        | 47875 | 48252 | + | PS01031 HSP20 Heat shock hsp20 proteins family       | ACD_sHsps-like[cd06464]                                                                    | heat-shock protein<br>[ <i>Staphylococcus delphini</i> ]                                                     | WP_019166846 | 36/95   |
| <i>orf 50</i>                       | 48428 | 48475 | + | no hit                                               | no hit                                                                                     | Erm(44) leader peptide 1<br>[ <i>Staphylococcus xylosus</i> ]                                                | CDL65149     | 100/100 |
| <i>orf 51</i>                       | 48503 | 48556 | + | no hit                                               | no hit                                                                                     | Erm(44) leader peptide 2<br>[ <i>Staphylococcus xylosus</i> ]                                                | CDL65150     | 100/100 |
| <i>orf 52</i><br>[ <i>erm(44)</i> ] | 48617 | 49348 | + | PS01131 Ribosomal RNA adenine dimethylases signature | AdoMet_MTases super family [cl17173]                                                       | 23S rRNA methylase for macrolide-lincosamide-streptogramin B resistance<br>[ <i>Staphylococcus xylosus</i> ] | CDL65151     | 100/100 |
| <i>orf53</i>                        | 51804 | 52001 | + | PS50943 HTH_CROC1 Cro/C1-type HTH domain             | HTH_XRE [cd00093]                                                                          | DNA-binding protein<br>[ <i>Virgibacillus halodenitrificans</i> ]                                            | WP_019376599 | 65/92   |
| <i>orf54</i>                        | 51970 | 52248 | + | no hit                                               | Pep_deformylase super family [cl00234]                                                     | peptide deformylase<br>[ <i>Bacillus</i> sp. 10403023]                                                       | WP_010676498 | 52/90   |
| <i>orf55</i>                        | 52226 | 52564 | + | no hit                                               | Pep_deformylase super family [cl00234]                                                     | peptide deformylase<br>[ <i>Bacillus fordii</i> ]                                                            | WP_018705992 | 63/100  |
| <i>orf56</i>                        | 53780 | 54976 | - | no hit                                               | KefB super family[cl10482]                                                                 | Kef-type K+ transport system, membrane component<br>[ <i>Propionibacterium acidipropionici</i> ATCC 4875]    | YP_006981026 | 56/99   |
